# Supplementary material for: Evaluation of the Safety and Efficacy of Hand Sanitizer Products Marketed to Children Available during the COVID-19 Pandemic
Source: MDPI journal article supplement (doi:10.3390/ijerph192114424), 2022-11-03
Supplement: s1 [file s1]

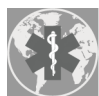

## Supplementary Materials

**Table S1.** Hand sanitizer active ingredients and impurities, chromatogram peak assignments, LOQ and calibration range.

| Active and Impurities           | CAS number | Retention Time (Min.) | Quantitation Ion (m/z) | LOQ ( $\mu\text{g mL}^{-1}$ ) | LOQ ( $\mu\text{g g}^{-1}$ ) | Calibration range ( $\mu\text{g/mL}$ ) | Calibration range ( $\mu\text{g/g}$ ) |
|---------------------------------|------------|-----------------------|------------------------|-------------------------------|------------------------------|----------------------------------------|---------------------------------------|
| <b>Active Ingredient:</b>       |            |                       |                        |                               |                              |                                        |                                       |
| Ethanol                         | 64-17-5    | 3.277                 | 31.1                   | 19.7                          | 1680 <sup>#</sup>            | 19.7 - 1970                            | 1680 - 168000 <sup>#</sup>            |
| Isopropyl alcohol (Isopropanol) | 67-63-0    | 4.149                 | 45.1                   | 19.6                          | 1670 <sup>#</sup>            | 19.6 - 1960                            | 1670 - 167000 <sup>#</sup>            |
| <b>Impurities:</b>              |            |                       |                        |                               |                              |                                        |                                       |
| Acetaldehyde                    | 75-07-0    | 2.158                 | 44.0                   | 3.53                          | 30.0 <sup>*</sup>            | 3.53 - 58.9                            | 30.0 - 501 <sup>*</sup>               |
| Methanol                        | 67-56-1    | 2.294                 | 31.1                   | 7.91                          | 67.2 <sup>*</sup>            | 7.91 - 791                             | 67.2 - 6720 <sup>*</sup>              |
| Acetone                         | 67-64-1    | 3.906                 | 43.1                   | 7.90                          | 67.2 <sup>*</sup>            | 7.90 - 790                             | 67.2 - 6720 <sup>*</sup>              |
| 1-Propanol                      | 71-23-8    | 6.001                 | 31.1                   | 8.04                          | 68.3 <sup>*</sup>            | 8.04 - 804                             | 68.3 - 6830 <sup>*</sup>              |
| Ethyl Acetate                   | 141-78-6   | 6.614                 | 43.1                   | 9.02                          | 76.6 <sup>*</sup>            | 9.02 - 902                             | 76.7 - 7670 <sup>*</sup>              |
| 2-Butanol                       | 78-92-2    | 6.743                 | 45.1                   | 8.08                          | 68.7 <sup>*</sup>            | 8.08 - 808                             | 68.7 - 6870 <sup>*</sup>              |
| Isobutanol                      | 78-83-1    | 7.056                 | 43.1                   | 8.03                          | 68.3 <sup>*</sup>            | 8.03 - 803                             | 68.3 - 6830 <sup>*</sup>              |
| Benzene                         | 71-43-2    | 7.339                 | 78.1                   | 0.44                          | 3.74 <sup>*</sup>            | 0.44 - 43.7                            | 3.74 - 371 <sup>*</sup>               |
| 1-Butanol                       | 71-36-3    | 7.803                 | 56.1                   | 8.10                          | 68.9 <sup>*</sup>            | 8.10 - 810                             | 68.9 - 6890 <sup>*</sup>              |
| (Acetal)                        | 105-57-7   | 8.165                 | 45.1                   | 0.62                          | 5.30 <sup>*</sup>            | 0.62 - 62.3                            | 5.30 - 530 <sup>*</sup>               |
| Isoamylalcohol                  | 123-51-3   | 8.687                 | 55.1                   | 8.09                          | 68.8 <sup>*</sup>            | 8.09 - 809                             | 68.8 - 6880 <sup>*</sup>              |
| Amyl Alcohol                    | 71-41-0    | 8.958                 | 42.1                   | 8.11                          | 68.9 <sup>*</sup>            | 8.11 - 811                             | 68.9 - 6890 <sup>*</sup>              |

\* based on sample volume 0.1mL, density 0.850g mL<sup>-1</sup>, # based on sample volume 0.01mL, density 0.850g mL<sup>-1</sup>.

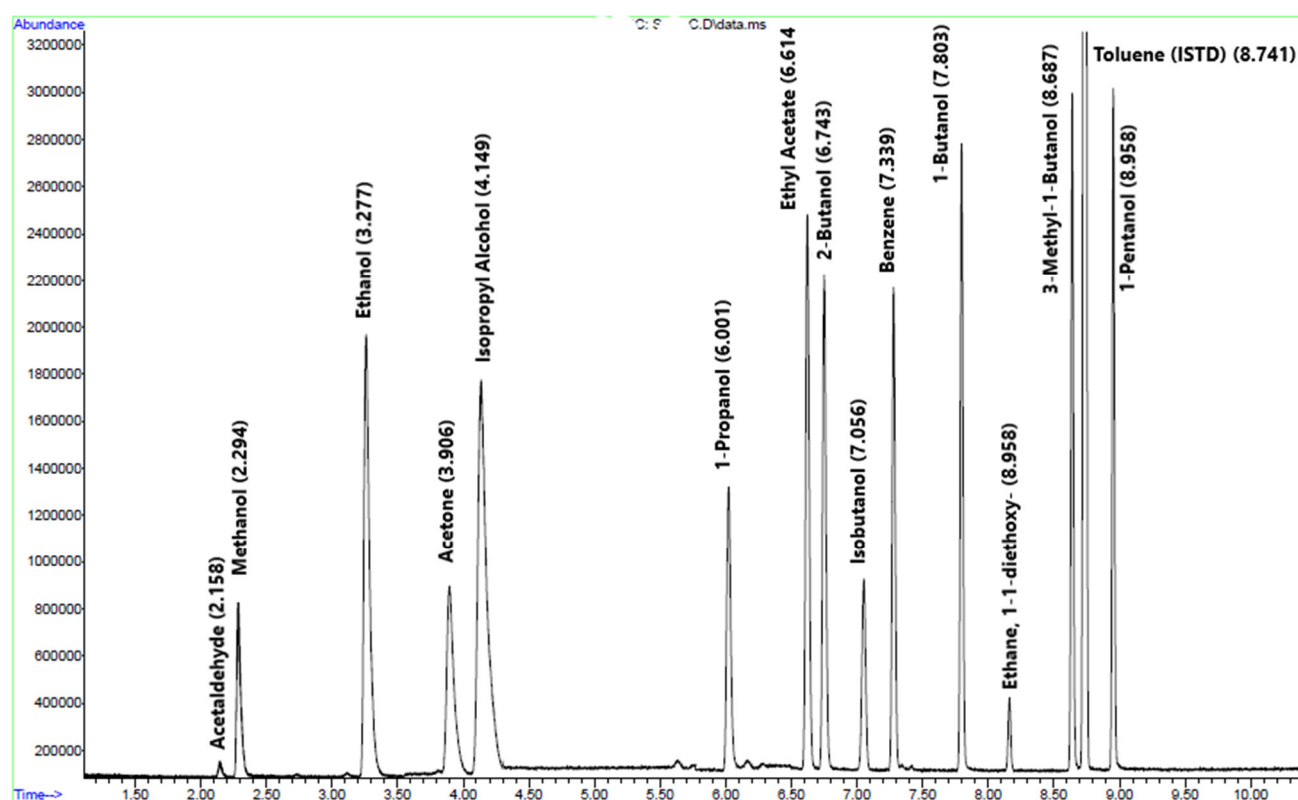

Figure S1. Total Ion Chromatogram (TIC) of Hand Sanitizer Active Ingredients and Impurities.

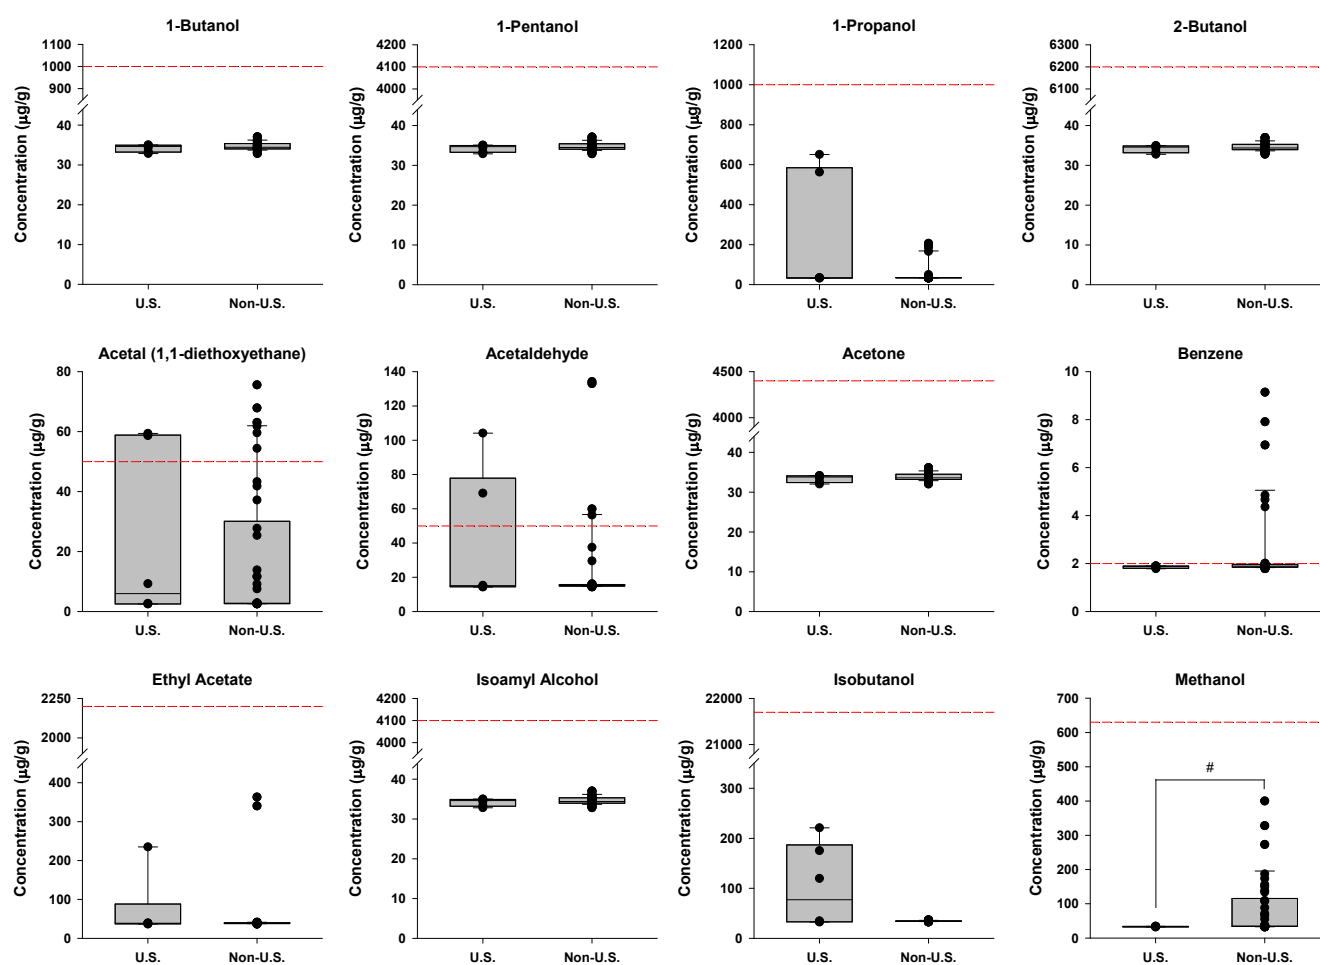

Figure S2. Impurity concentrations in U.S. and non-U.S. manufactured products. Statistical differences are indicated with a bracket and number sign. For details on statistical tests refer to Supplemental Table 2.

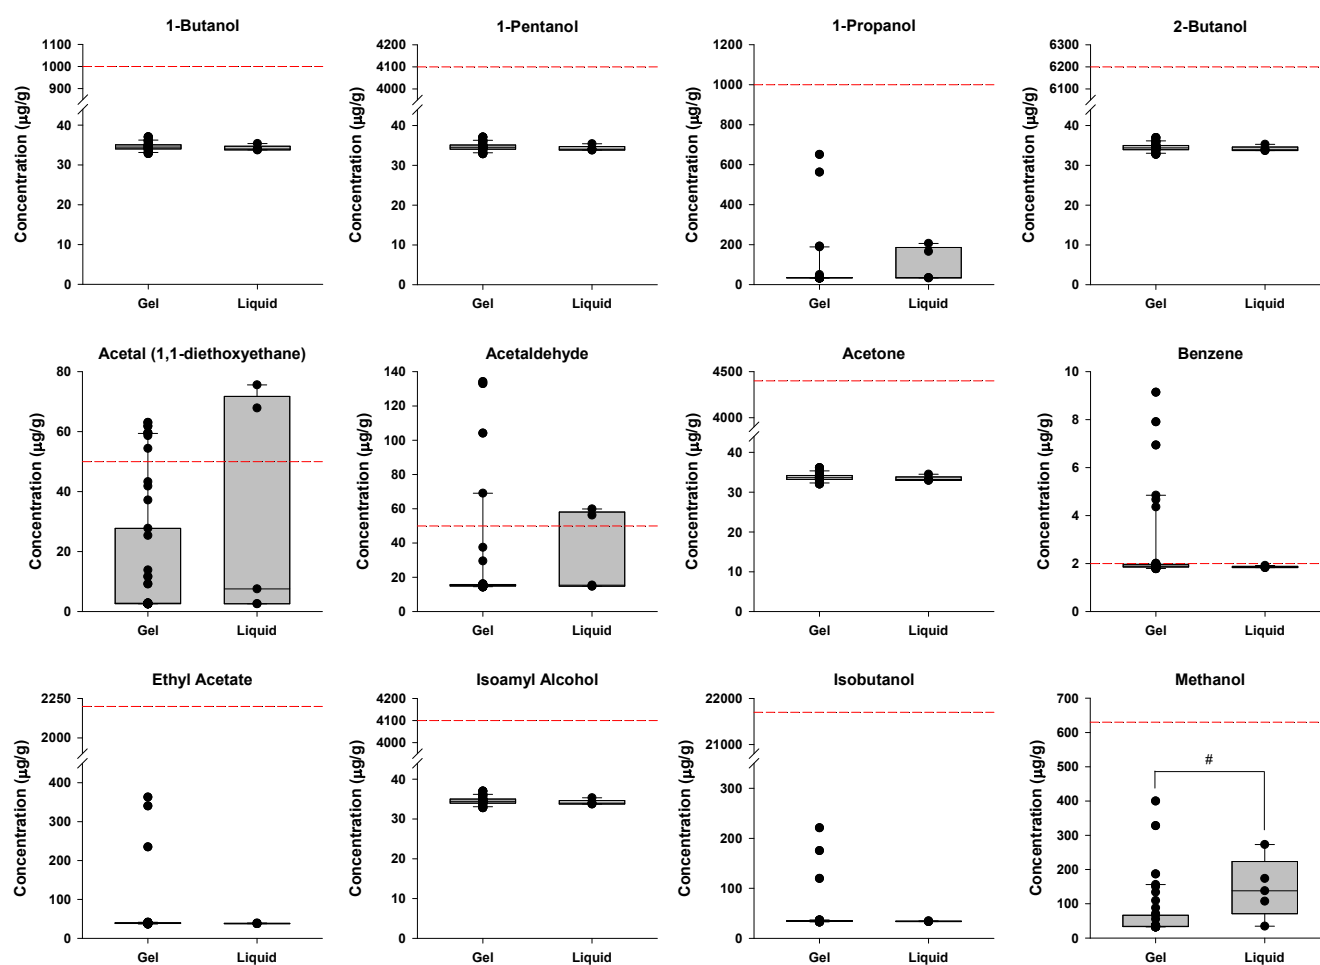

Figure S3. Impurity concentrations in gel and liquid products. Statistical differences are indicated with a bracket and number sign. For details on statistical tests refer to Supplemental Table 2.

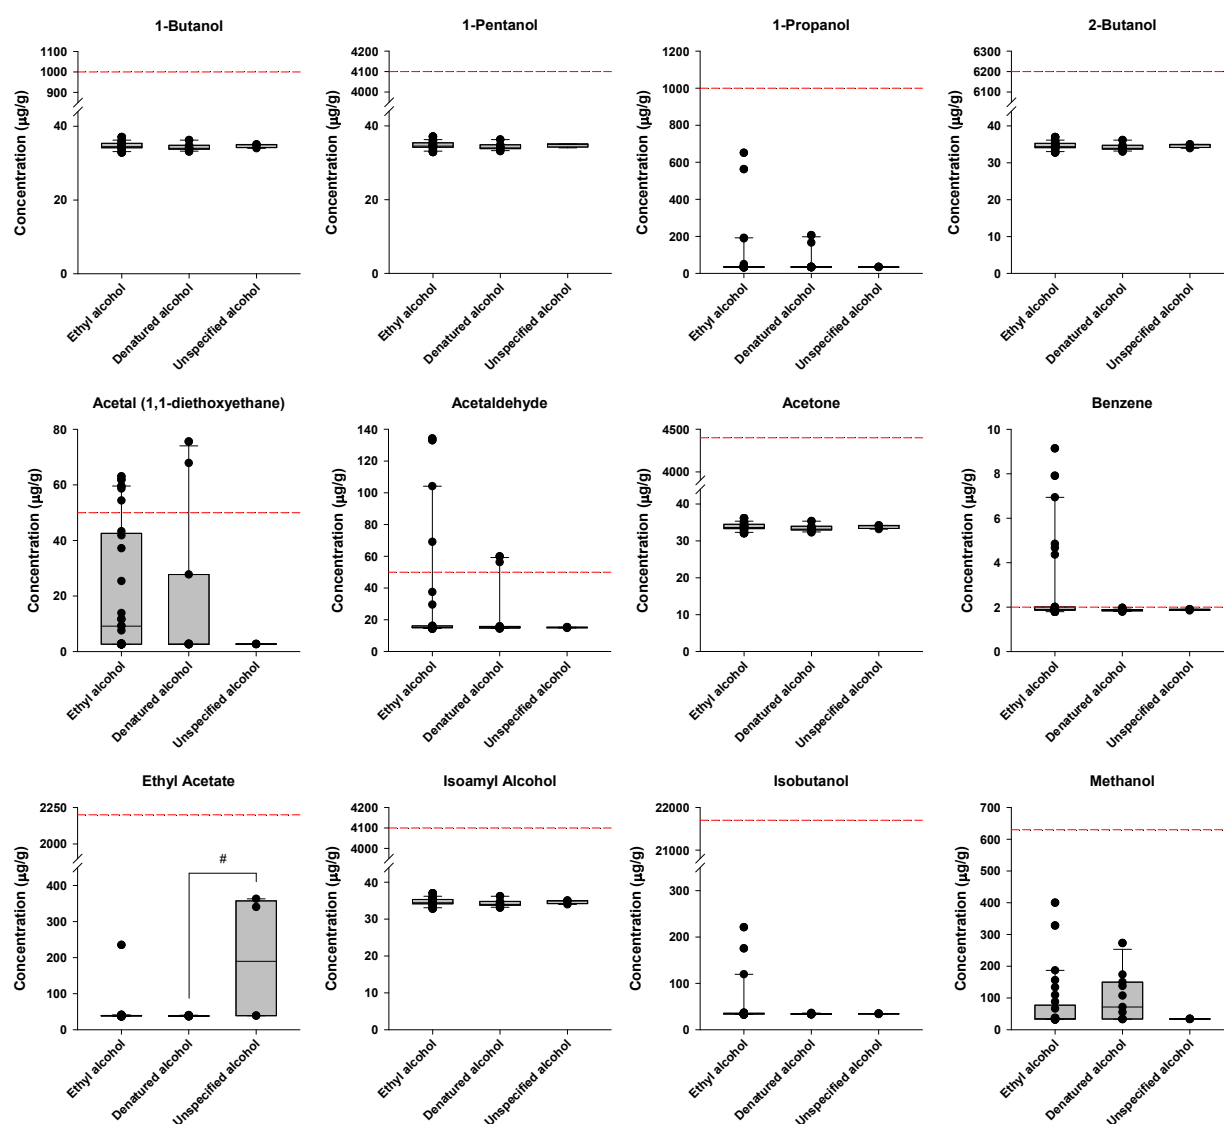

**Figure S4. Impurity concentrations in products by type of active ingredient.** Statistical differences are indicated with a bracket and number sign. For details on statistical tests refer to Supplemental Table 2.

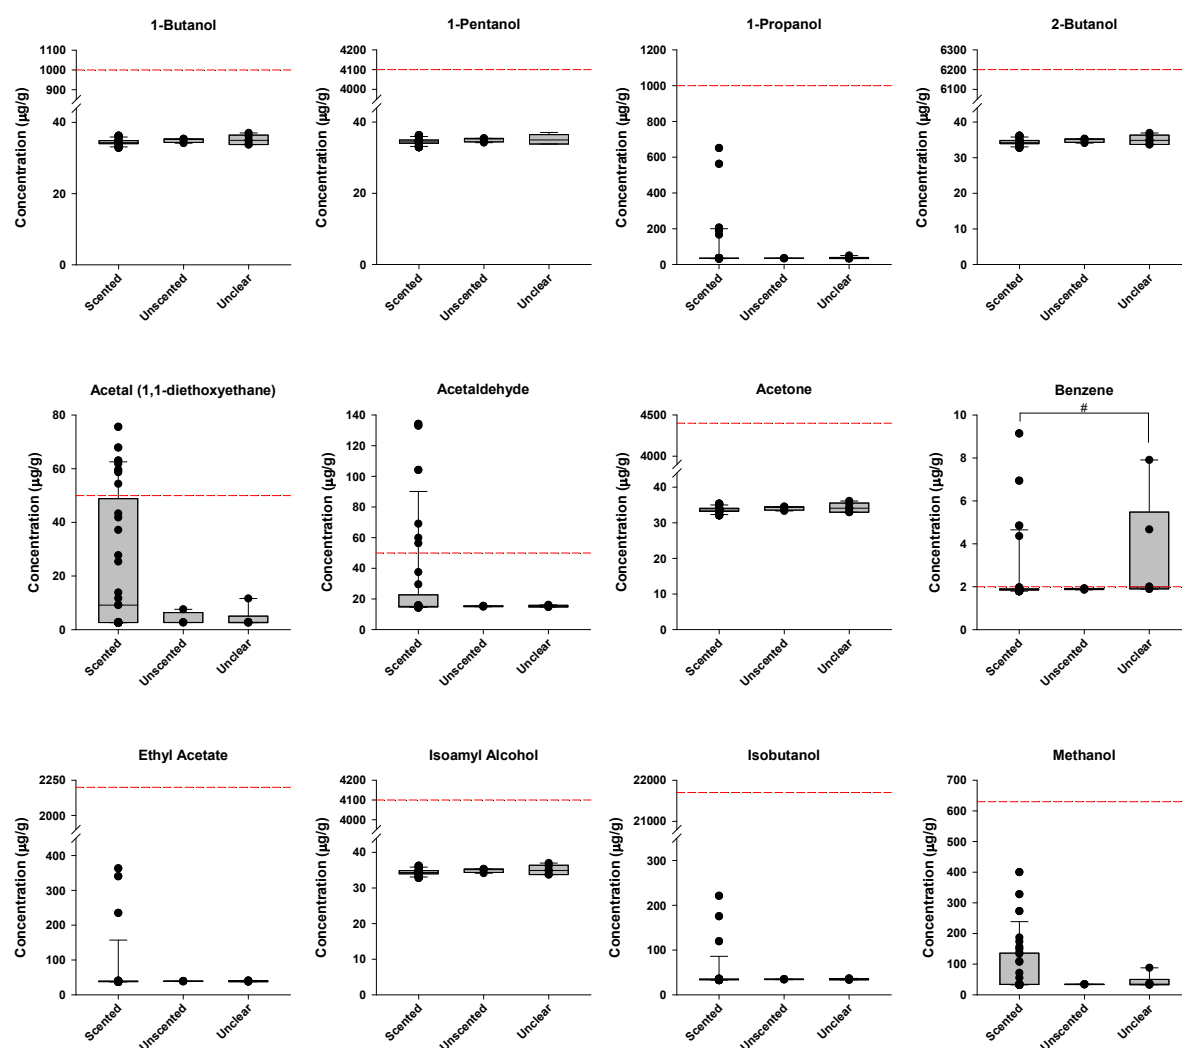

**Figure S5. Impurity concentrations in scented or non-scented products.** Statistical differences are indicated with a bracket and number sign. For details on statistical tests refer to Supplemental Table 2.

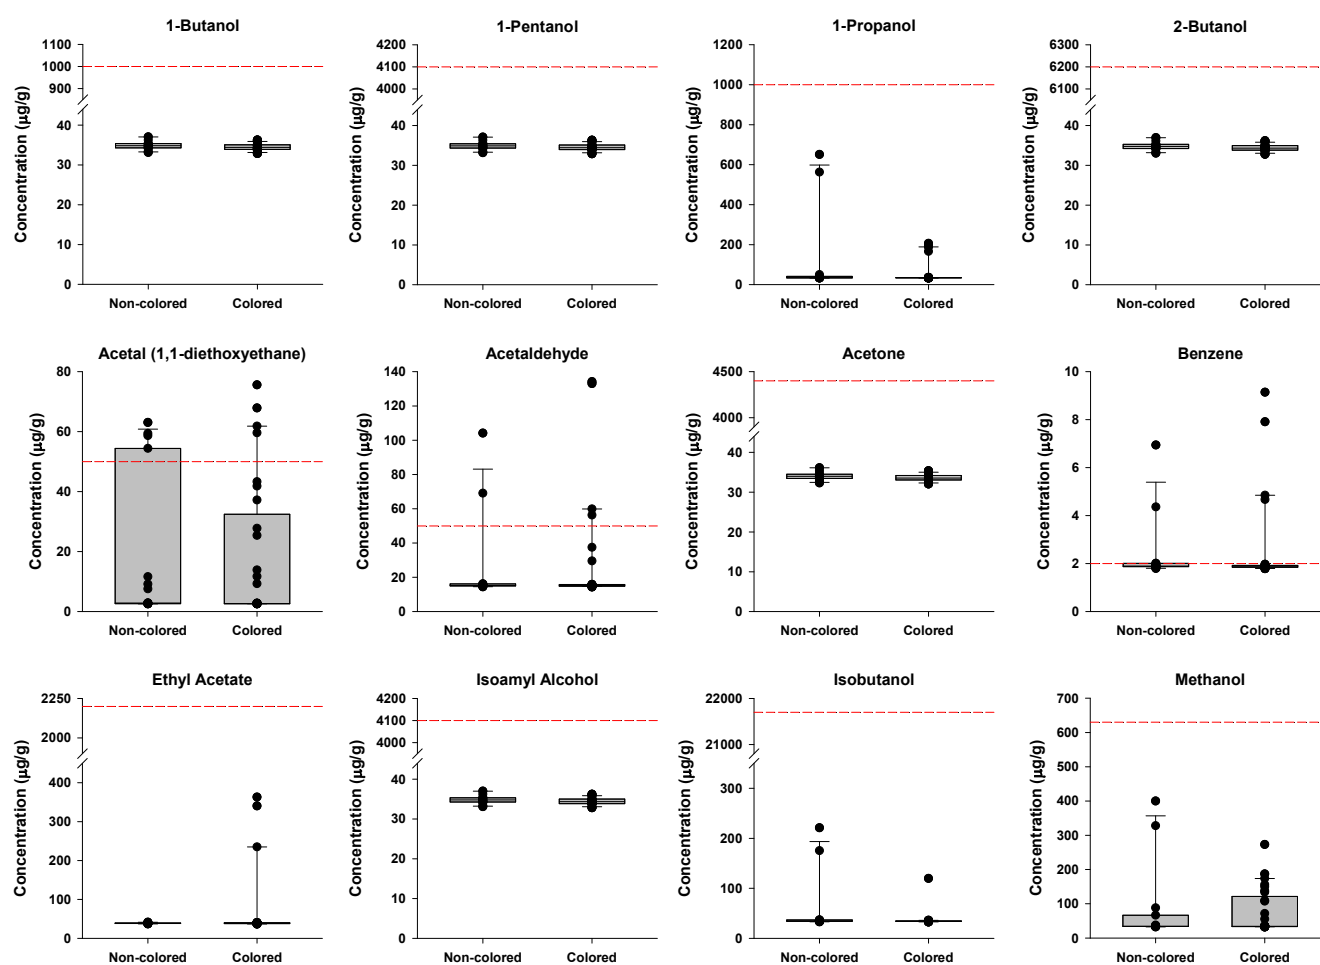

Figure S6. Impurity concentrations in non-colored and colored products. No statistically significant differences were noted. For details on statistical tests refer to Supplemental Table 2.

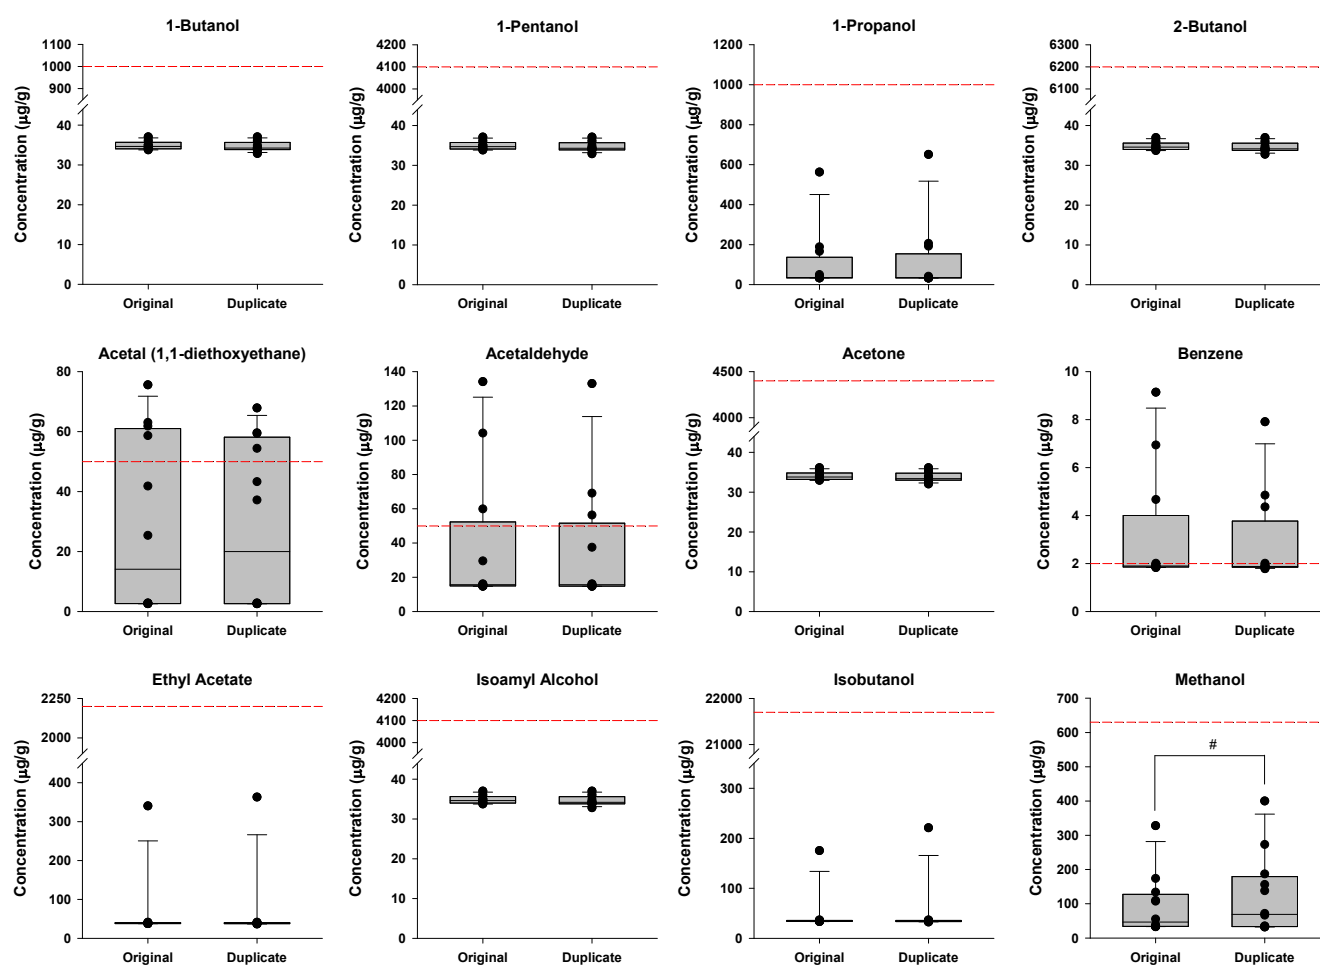

**Figure S7.** Impurity concentrations in original and duplicate samples. Statistical differences are indicated with a bracket and number sign. For details on statistical tests refer to Supplemental Table 2.



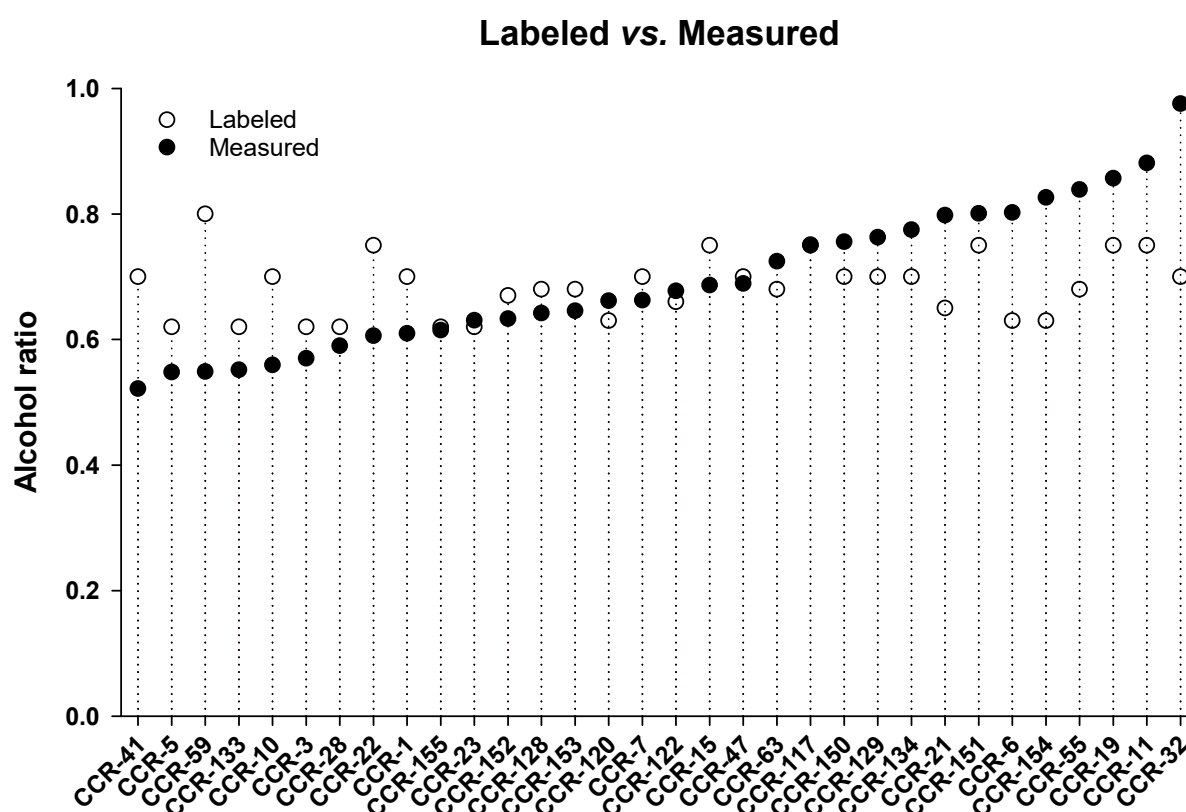

**Figure S8.** Labeled vs. measured alcohol concentrations in hand sanitizers marketed to children (expressed as a ratio fraction).

**Table S2.** Statistical tests for comparing impurity concentrations in U.S. and non-U.S. products.

| Impurity        | Normality (Shapiro-Wilk) |         | Mann-Whitney Rank Sum test |              | Student's t-test |         |
|-----------------|--------------------------|---------|----------------------------|--------------|------------------|---------|
|                 | Result                   | p-value | Result                     | p-value      | Result           | p-value |
| 1-Butanol       | Passed                   | 0.203   | -                          | -            | n.s.             | 0.314   |
| 1-Pentanol      | Passed                   | 0.203   | -                          | -            | n.s.             | 0.314   |
| 1-Propanol      | Failed                   | <0.050  | n.s.                       | 0.945        | -                | -       |
| 2-Butanol       | Passed                   | 0.203   | -                          | -            | n.s.             | 0.314   |
| Acetal          | Failed                   | <0.050  | n.s.                       | 0.771        | -                | -       |
| Acetaldehyde    | Failed                   | <0.050  | n.s.                       | 0.824        | -                | -       |
| Acetone         | Passed                   | 0.203   | -                          | -            | n.s.             | 0.314   |
| Benzene         | Failed                   | <0.050  | n.s.                       | 0.288        | -                | -       |
| Ethyl acetate   | Failed                   | <0.050  | n.s.                       | 1.000        | -                | -       |
| Isoamyl alcohol | Passed                   | 0.203   | -                          | -            | n.s.             | 0.314   |
| Isobutanol      | Failed                   | <0.050  | n.s.                       | 0.320        | -                | -       |
| Methanol        | Failed                   | <0.050  | *                          | <b>0.034</b> | -                | -       |

\* Concentration in non-U.S. products is significantly higher than in U.S. products; 'n.s.' denotes 'not significant'; '-' not tested.
